# Supplementary material
Source: MDPI journal article supplement (https://www.mdpi.com/2071-1050/14/19/12529)
Supplement: s1 [file s1]

Archive with 2 entries (2 files):
- Archive file STRUCTURES.zip
- sustainability-1918715-supplementary figure and table.pdf
