# Supplementary material
Source: MDPI journal article supplement (https://www.mdpi.com/2071-1050/14/19/12529)
Supplement: s1 [file s1 › sustainability-1918715-supplementary figure and table.pdf]

# Supplementary Material

Kamil Wojtkowiak , Jarosław J. Panek and Aneta Jezierska\*

## **Polychlorinated biphenyls interactions with water – characterization based on the analysis of non-covalent interactions and energy partitioning**

University of Wrocław, Faculty of Chemistry, ul. F. Joliot-Curie 14, 50-383 Wrocław, Poland

\* Correspondence: [aneta.jezierska@chem.uni.wroc.pl](mailto:aneta.jezierska@chem.uni.wroc.pl)

## Table of contents

| Title                                                                                                                                                                                                                                                                         | Page |
|-------------------------------------------------------------------------------------------------------------------------------------------------------------------------------------------------------------------------------------------------------------------------------|------|
| <b>Table S1.</b> Binding or interaction energies in kcal mol <sup>-1</sup> between PCBs and water or chlorine in the studied 1:1 complexes. Results of supermolecular MP2 (binding energy) and perturbational SAPT2 (interaction energy) approaches with def2-TZVP basis set. | 3    |
| <b>Figure S1.</b> Microsolvation shells – snapshots from the classical MD runs of the studied PCBs in water, used in the solvation shell interaction energy study at the RI-MP2/def2-TZVP level.                                                                              | 4    |

**Table S1.** Binding or interaction energies in kcal mol<sup>-1</sup> between PCBs and water or chlorine in the studied 1:1 complexes. Results of supermolecular MP2 (binding energy) and perturbational SAPT2 (interaction energy) approaches with def2-TZVP basis set. The contributions summing up to the total SAPT2 energy are: Elst = electrostatics; Exch = Exchange; Ind = Induction; Disp = Dispersion.

| System                    | RI-MP2/def2-TZVP | SAPT2/def2-TZVP | Elst   | Exch   | Ind    | Disp   |
|---------------------------|------------------|-----------------|--------|--------|--------|--------|
| <b>Water complexes</b>    |                  |                 |        |        |        |        |
| <b>a1</b>                 | 2.602            | -2.914          | -4.012 | 5.868  | -1.001 | -3.769 |
| <b>a2</b>                 | 3.283            | -3.398          | -4.799 | 6.175  | -1.428 | -3.345 |
| <b>b1</b>                 | 2.485            | -2.835          | -3.773 | 5.863  | -1.064 | -3.861 |
| <b>b2</b>                 | 2.526            | -2.811          | -3.834 | 6.211  | -1.349 | -3.839 |
| <b>c1</b>                 | 0.913            | -1.053          | -1.679 | 2.298  | -0.623 | -1.049 |
| <b>c2</b>                 | 2.567            | -2.942          | -4.523 | 5.831  | -1.055 | -3.195 |
| <b>d1</b>                 | 1.542            | -1.655          | -2.235 | 2.724  | -0.689 | -1.455 |
| <b>d2</b>                 | 3.847            | -4.253          | -5.474 | 5.737  | -1.518 | -2.999 |
| <b>e1</b>                 | 1.047            | -1.299          | -2.102 | 2.705  | -0.498 | -1.404 |
| <b>e2</b>                 | 2.124            | -2.453          | -3.665 | 6.018  | -1.093 | -3.713 |
| <b>Chlorine complexes</b> |                  |                 |        |        |        |        |
| <b>a1</b>                 | 4.004            | -4.123          | -5.027 | 11.806 | -2.508 | -8.394 |
| <b>a2</b>                 | 3.858            | -3.976          | -5.009 | 11.401 | -2.44  | -7.928 |
| <b>b1</b>                 | 2.617            | -2.855          | -2.969 | 6.091  | -0.885 | -5.093 |
| <b>b2</b>                 | 3.883            | -3.969          | -5.216 | 11.844 | -2.563 | -8.034 |
| <b>c1</b>                 | 3.987            | -4.109          | -5.025 | 12.162 | -2.563 | -8.683 |
| <b>c2</b>                 | 3.994            | -4.113          | -5.003 | 12.097 | -2.557 | -8.65  |
| <b>d1</b>                 | 3.166            | -3.691          | -3.602 | 9.008  | -1.537 | -7.561 |
| <b>d2</b>                 | 4.000            | -4.173          | -5.050 | 12.185 | -2.586 | -8.723 |
| <b>e1</b>                 | 1.550            | -1.610          | -1.751 | 3.105  | -0.409 | -2.555 |
| <b>e2</b>                 | 4.278            | -4.721          | -3.961 | 9.291  | -0.635 | -9.416 |

| Solute        | Snapshot taken at the following time of production run:                             |                                                                                     |                                                                                     |                                                                                      |                                                                                       |
|---------------|-------------------------------------------------------------------------------------|-------------------------------------------------------------------------------------|-------------------------------------------------------------------------------------|--------------------------------------------------------------------------------------|---------------------------------------------------------------------------------------|
|               | 0.5 ns                                                                              | 1.5 ns                                                                              | 2.5 ns                                                                              | 3.5 ns                                                                               | 4.5 ns                                                                                |
| PCB15<br>(a)  | 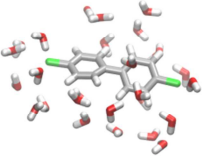   | 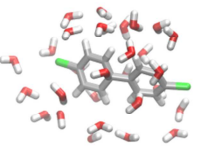   | 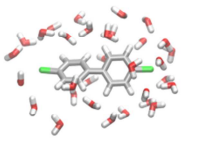   | 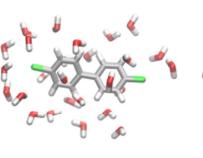   | 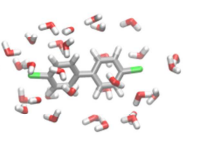   |
| PCB11<br>(b)  | 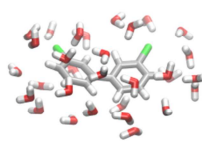   | 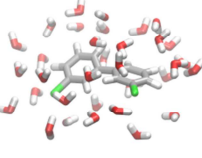   | 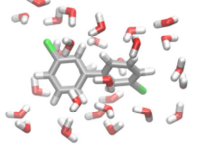   | 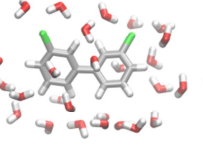   | 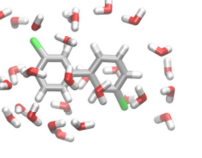   |
| PCB80<br>(c)  | 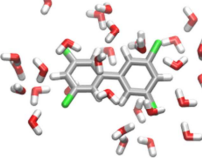   | 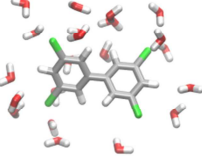   | 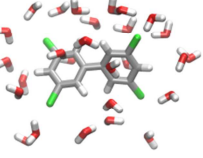   | 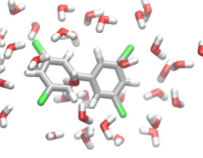   | 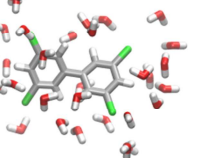   |
| PCB77<br>(d)  | 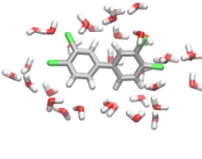 | 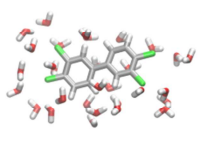 | 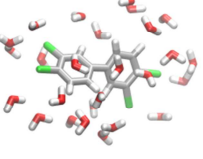 | 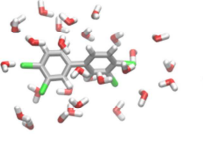 | 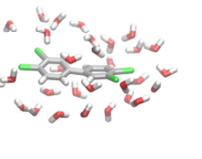 |
| PCB169<br>(e) | 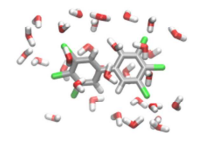 | 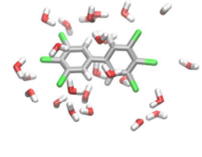 | 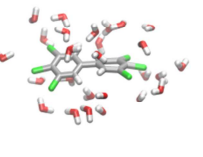 | 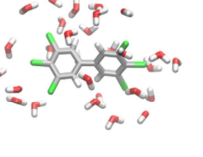 | 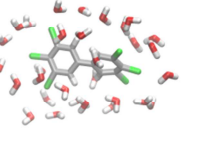 |

**Figure S1.** Microsolvation shells – snapshots from the classical MD runs of the studied PCBs in water, used in the solvation shell interaction energy study at the RI-MP2/def2-TZVP level.
